# Supplementary material
Source: PubMed Central journal article supplement (PMC3183909)
Supplement: hdy2010122x2.pdf [file hdy2010122x2.pdf]

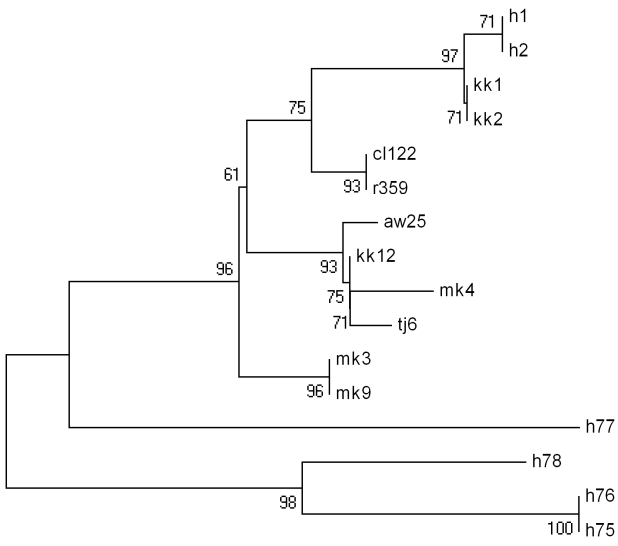

0.001

ND1

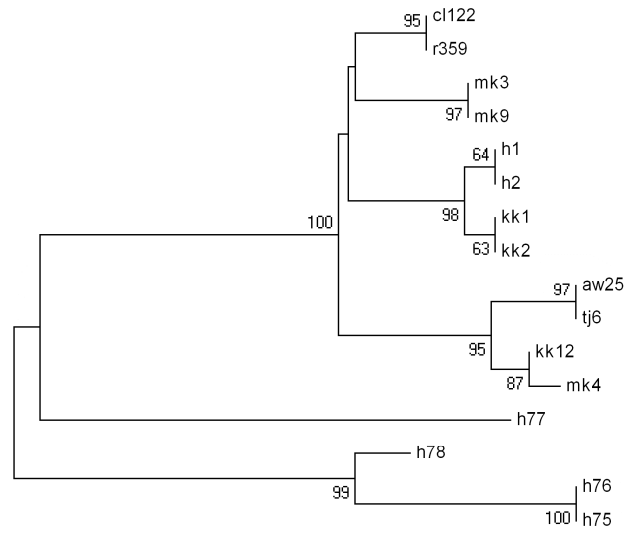

0.001

ND2

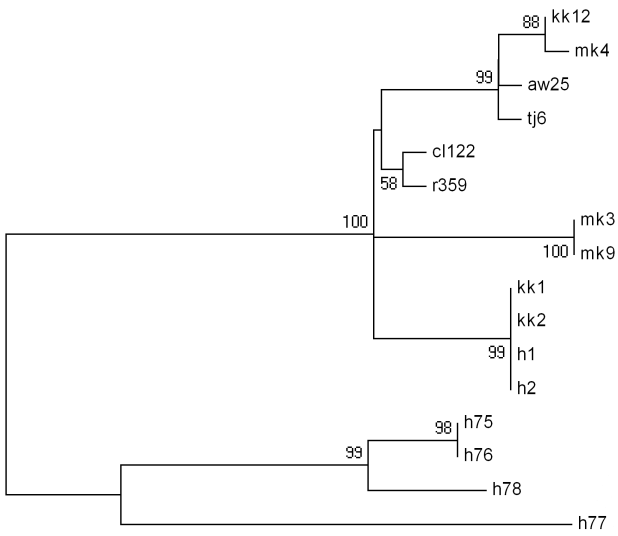

0.001

ND4

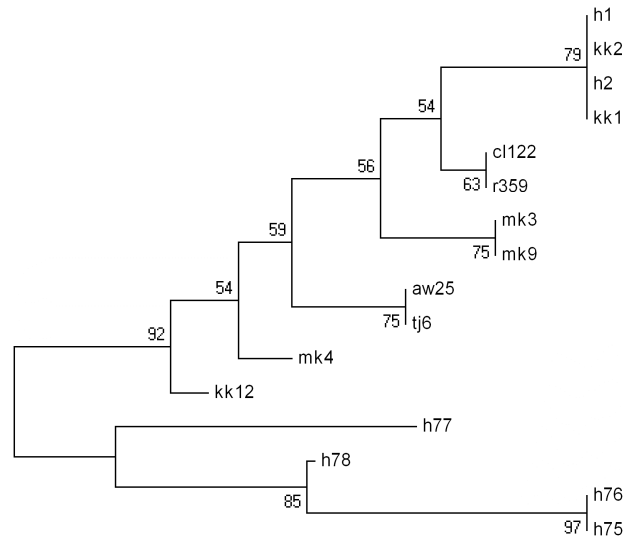

0.001

ND4L

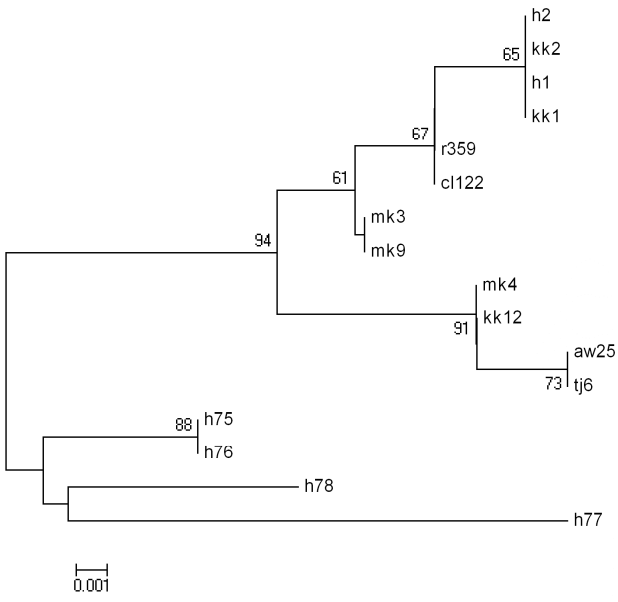

ND3

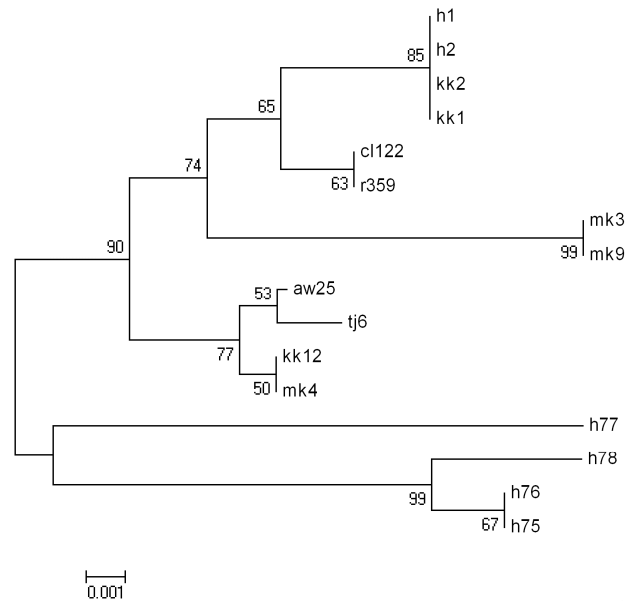

ND6L

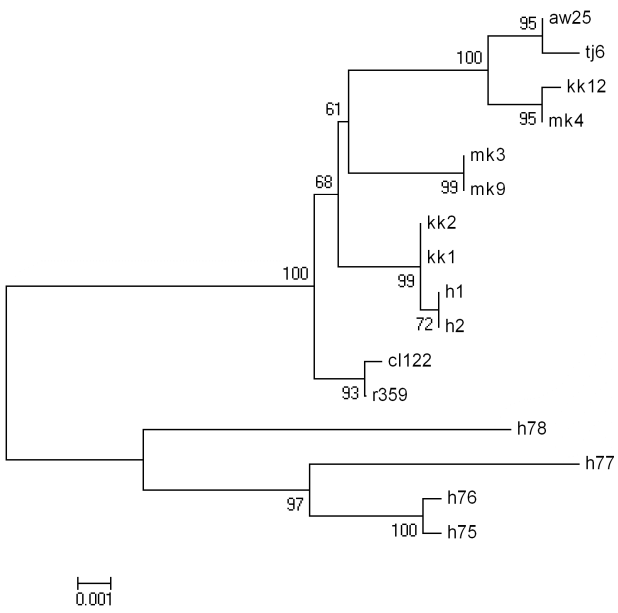

ND5

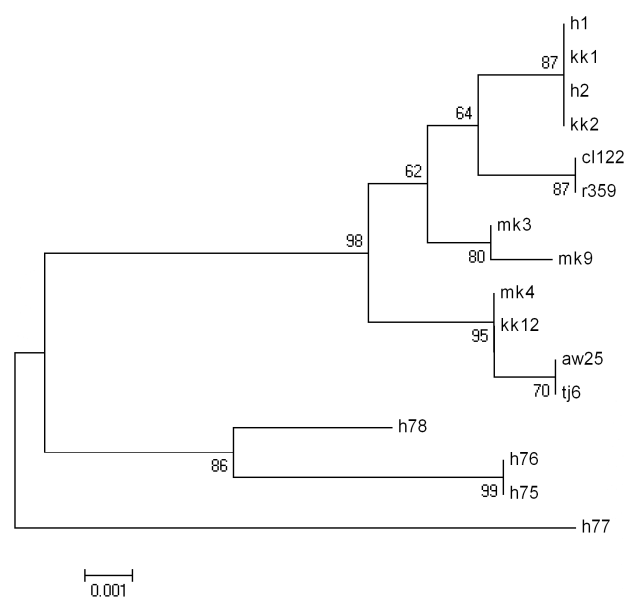

COIII

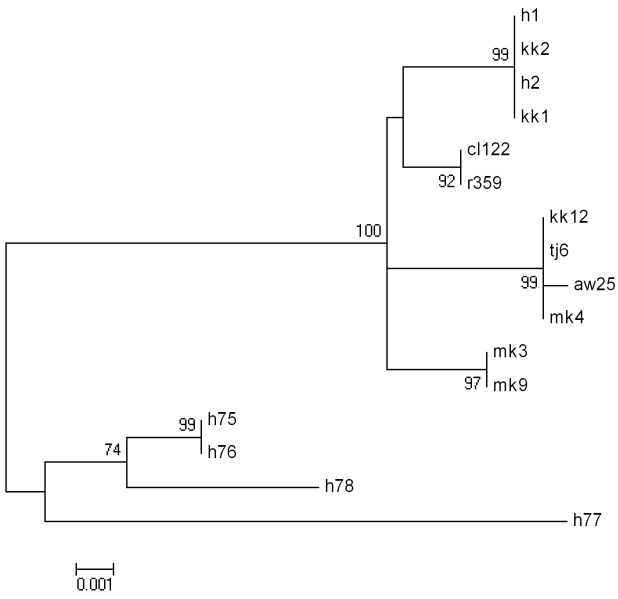

COI

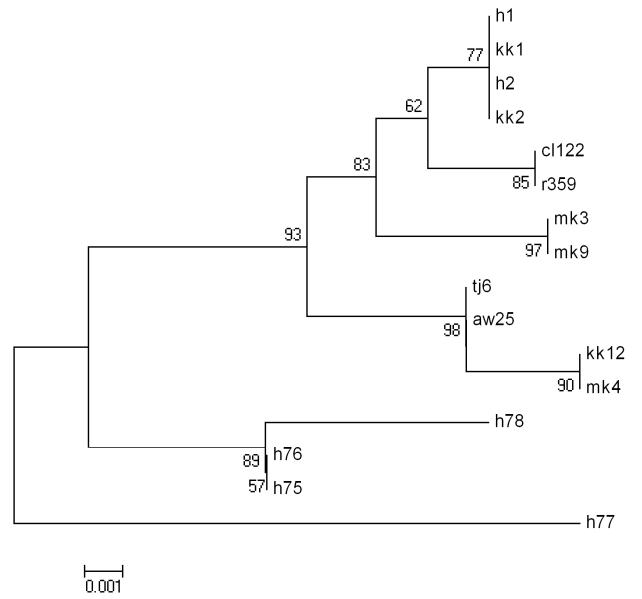

COII

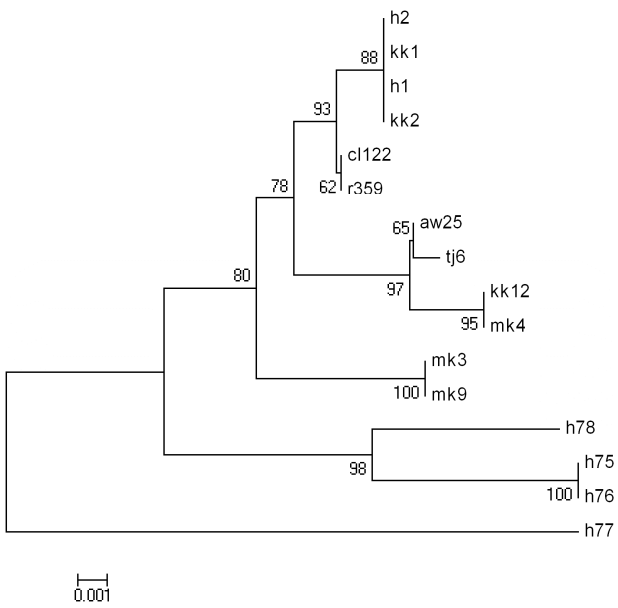

*Cyt b*

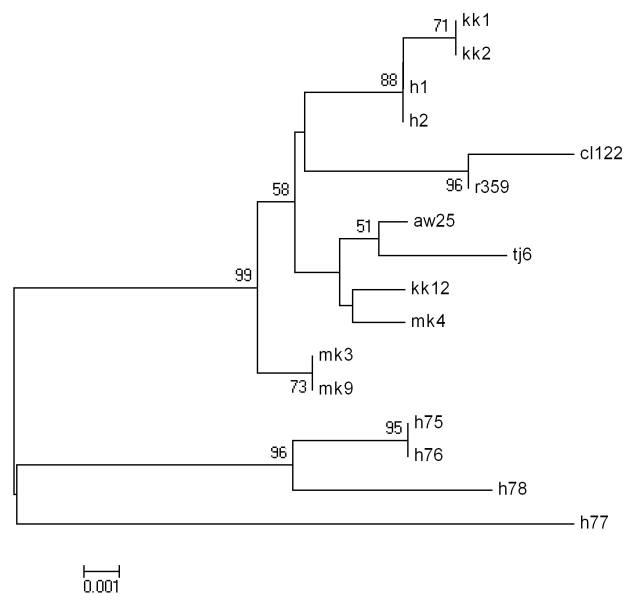

ATPase6

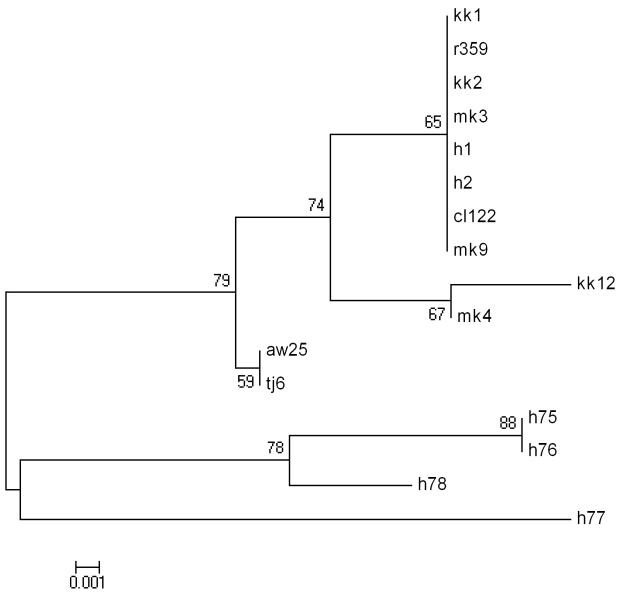

ATPase8

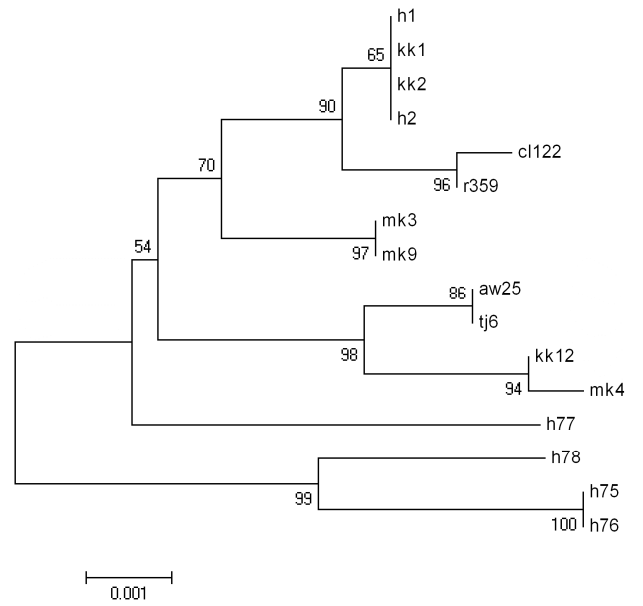

16s rRNA

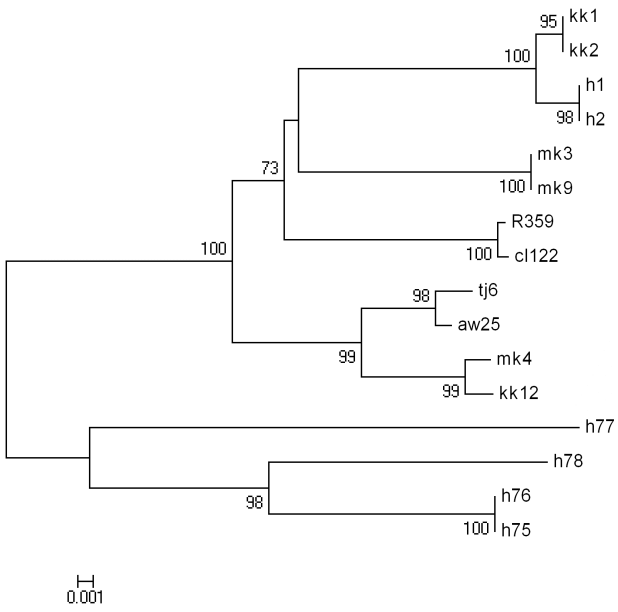

Control Region

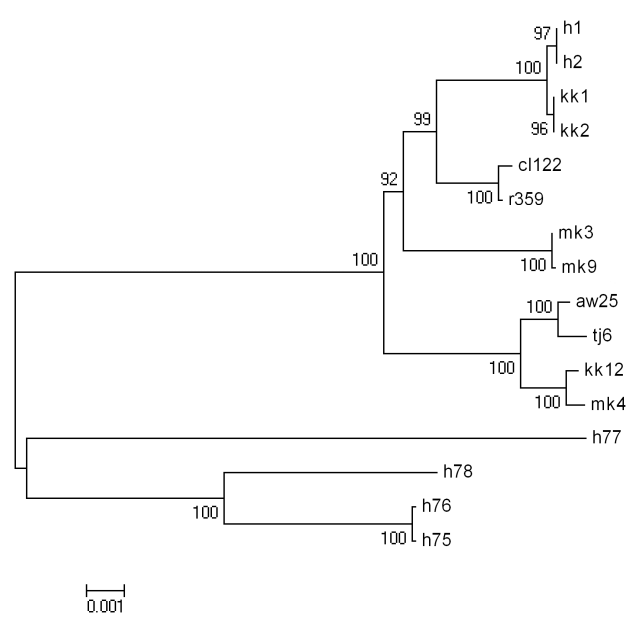

Protein Coding Genes Concatemer

Supplementary Figure 2.
