# Supplementary material
Source: PubMed Central journal article supplement (PMC3183909)

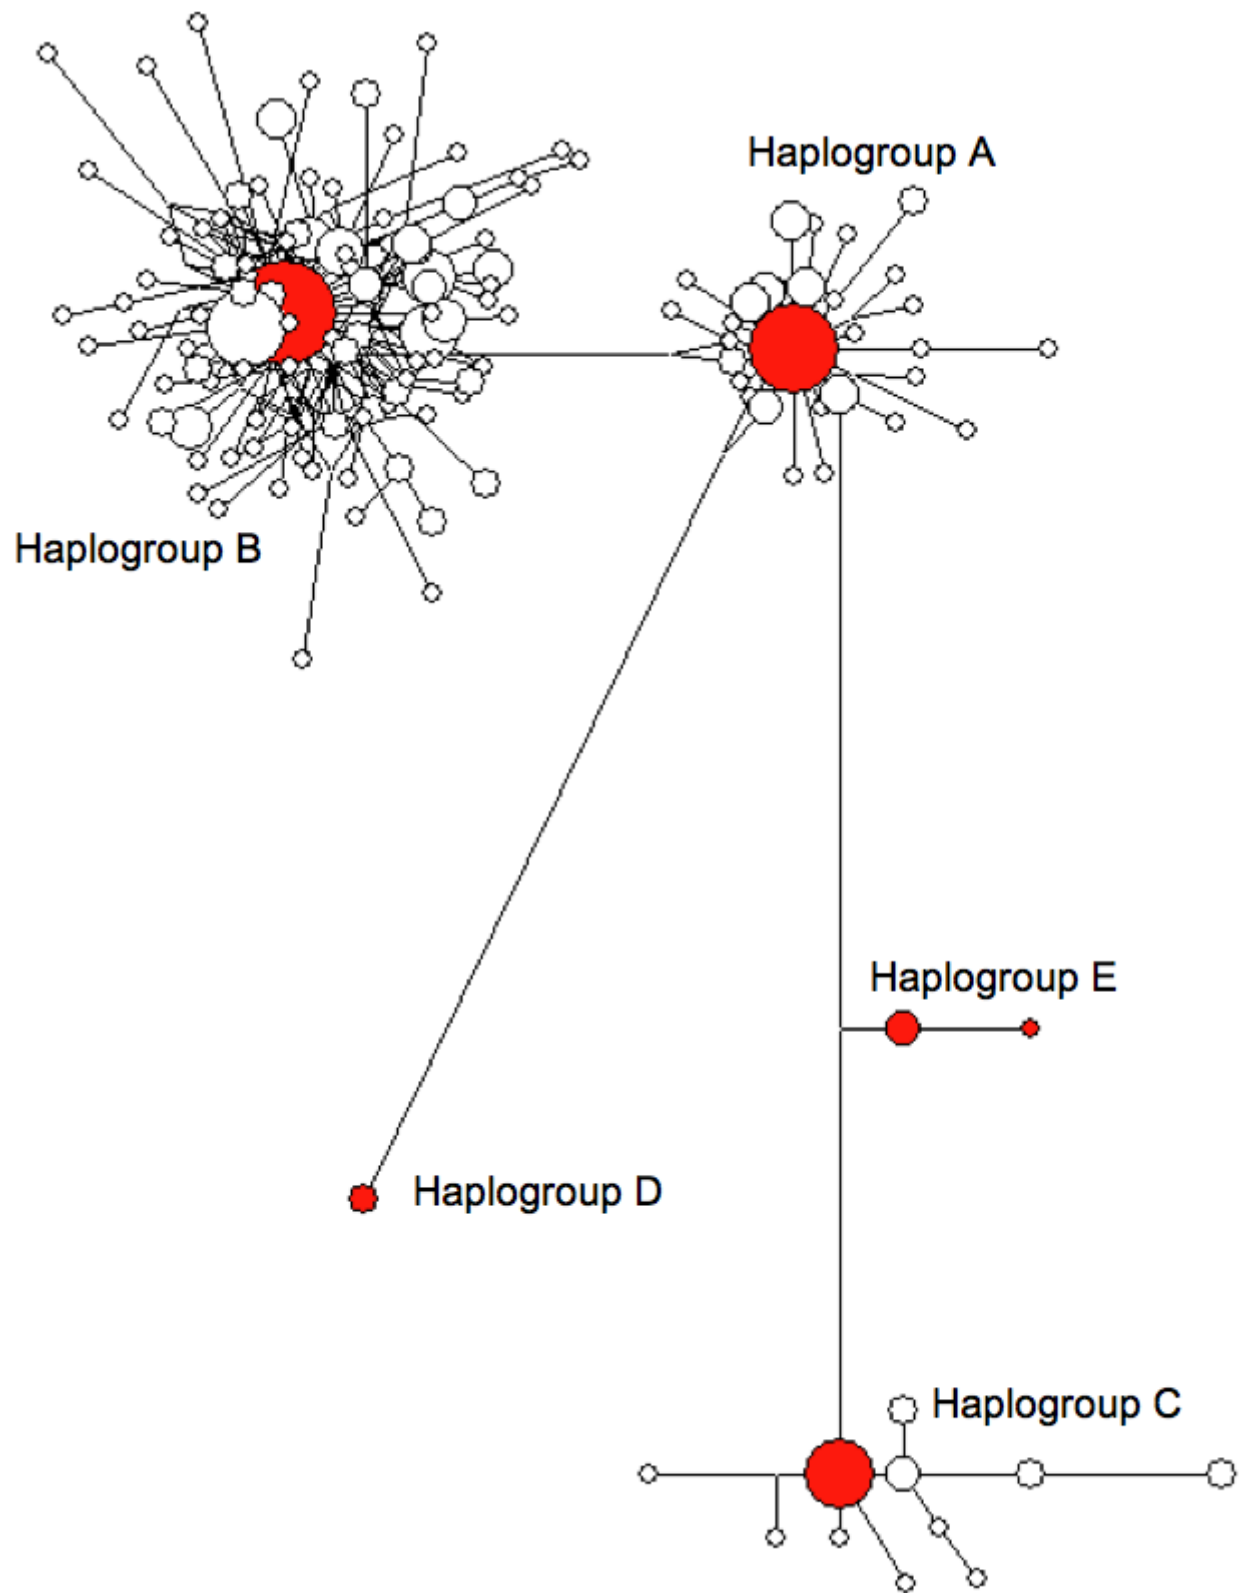

Supplement: hdy2010122x1.pdf [file hdy2010122x1.pdf]
